# Supplementary material for: Starch and protein hydrolysis in cooked quinoa (Chenopodium quinoa Willd.) during static and dynamic in vitro oral and gastric digestion
Source: Royal Society of Chemistry journal article supplement (doi:10.1039/d1fo02685b), 2021-12-17
Supplement: d1fo02685b1.pdf [file d1fo02685b1.pdf]

## Supplementary Material

**Supplemental Table 1.** Whole digesta moisture content (solid particles and liquids before separation) from both oral and gastric digestion models. Values represent averages ( $n = 3$ )  $\pm$  standard deviation. Different letters within each column (abcde) and within each row (zyx) represent means that are significantly different across either the row or column ( $p < 0.05$ ).

|                                                                            | Digestion time (min) | Oral Static                     |                                 | Oral Dynamic                    |                                 |
|----------------------------------------------------------------------------|----------------------|---------------------------------|---------------------------------|---------------------------------|---------------------------------|
|                                                                            |                      | Gastric Static                  | Gastric Dynamic                 | Gastric Static                  | Gastric Dynamic                 |
| <b>Whole Digesta Moisture Content</b><br>(g H <sub>2</sub> O/g dry matter) | 30                   | 9.71 <sup>a,zy</sup> $\pm$ 2.07 | 7.98 <sup>b,y</sup> $\pm$ 0.87  | 10.94 <sup>a,z</sup> $\pm$ 2.61 | 4.55 <sup>d,x</sup> $\pm$ 0.46  |
|                                                                            | 60                   | 10.44 <sup>a,x</sup> $\pm$ 2.00 | 7.79 <sup>b,y</sup> $\pm$ 0.52  | 10.40 <sup>a,x</sup> $\pm$ 2.09 | 4.15 <sup>d,z</sup> $\pm$ 0.14  |
|                                                                            | 90                   | 9.41 <sup>a,z</sup> $\pm$ 0.95  | 8.28 <sup>b,z</sup> $\pm$ 0.21  | 9.49 <sup>ab,z</sup> $\pm$ 1.65 | 4.87 <sup>d,y</sup> $\pm$ 0.18  |
|                                                                            | 120                  | 9.74 <sup>a,z</sup> $\pm$ 0.85  | 9.07 <sup>b,z</sup> $\pm$ 0.19  | 8.32 <sup>b,zy</sup> $\pm$ 1.96 | 6.66 <sup>c,y</sup> $\pm$ 1.26  |
|                                                                            | 150                  | 9.44 <sup>a,zy</sup> $\pm$ 0.52 | 10.62 <sup>a,z</sup> $\pm$ 1.48 | 8.76 <sup>b,zy</sup> $\pm$ 1.35 | 8.01 <sup>b,y</sup> $\pm$ 0.68  |
|                                                                            | 180                  | 9.23 <sup>a,y</sup> $\pm$ 1.37  | 11.79 <sup>a,z</sup> $\pm$ 1.92 | 8.06 <sup>b,y</sup> $\pm$ 0.92  | 12.63 <sup>a,z</sup> $\pm$ 1.49 |

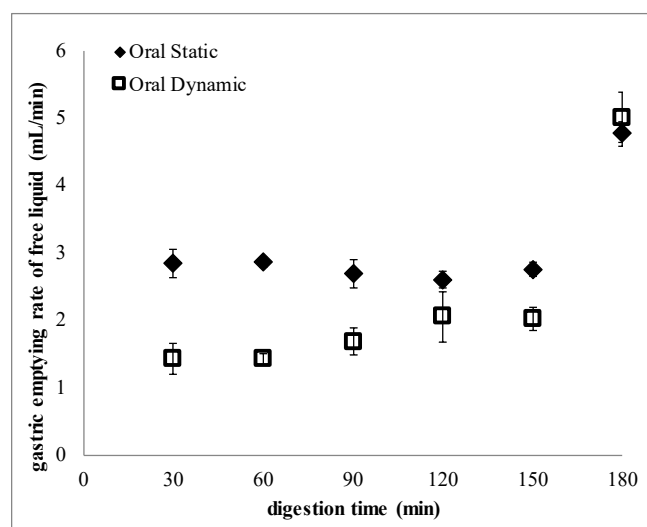

**Supplementary Fig. 1** Gastric emptying rate of free liquid during dynamic gastric digestion after oral static digestion (filled symbols) and oral dynamic digestion (unfilled symbols). Values represent the average ( $n = 3$ )  $\pm$  standard deviation.

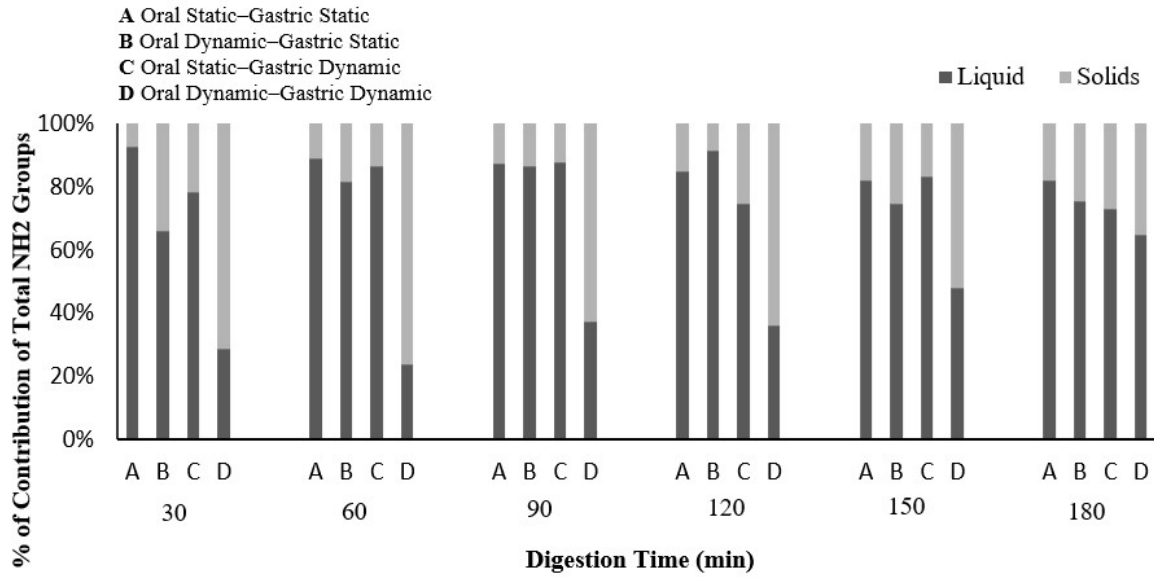

**Supplementary Fig. 2** Liquid and solid contribution to the total amino group content of the whole digesta along gastric digestion of all treatments. Values represent the average (n = 3 digestion replicates).

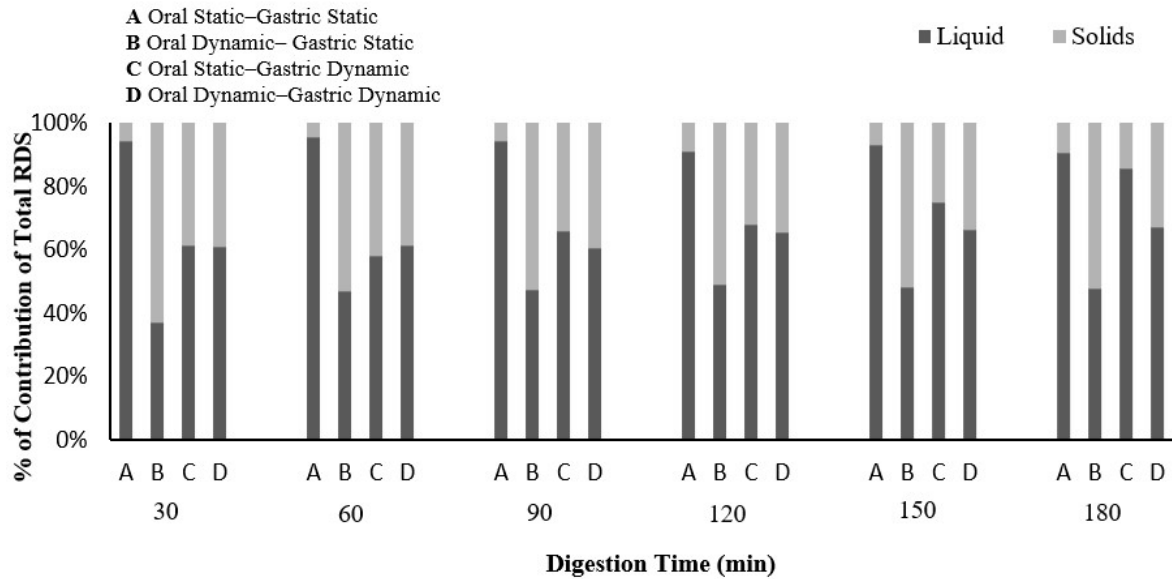

**Supplementary Fig. 3** Liquid and solids contribution to the total reducing sugar content of the whole digesta along gastric digestion of all treatments. Values represent the average (n = 3).
